# Supplementary material for: Ab initio two-sites occupancy and broadband near-infrared emission of Cr3+ in Li2MgZrO4
Source: Royal Society of Chemistry journal article supplement (doi:10.1039/d1qm00431j), 2021-01-01
Supplement: d1qm00431j1.pdf [file d1qm00431j1.pdf]

## Supporting information

### *Ab Initio* Two-sites Occupancy and Broadband Near-Infrared

#### Emission of Cr<sup>3+</sup> in Li<sub>2</sub>MgZrO<sub>4</sub>

Xue Zhou<sup>1</sup>, Jinmeng Xiang<sup>1</sup>, Jiming Zheng, Xiaoqi Zhao, Hao Suo, Chongfeng Guo\*

State Key Laboratory of Photon-Technology in Western China Energy, Institute of Photonics & Photon-

Technology, Northwest University, Xi'an, 710069, China;

---

Author to whom correspondence should be addressed

E-mail: [guocf@nwu.edu.cn](mailto:guocf@nwu.edu.cn) (Prof. Guo);

Tel & Fax: ±86-29-88302661

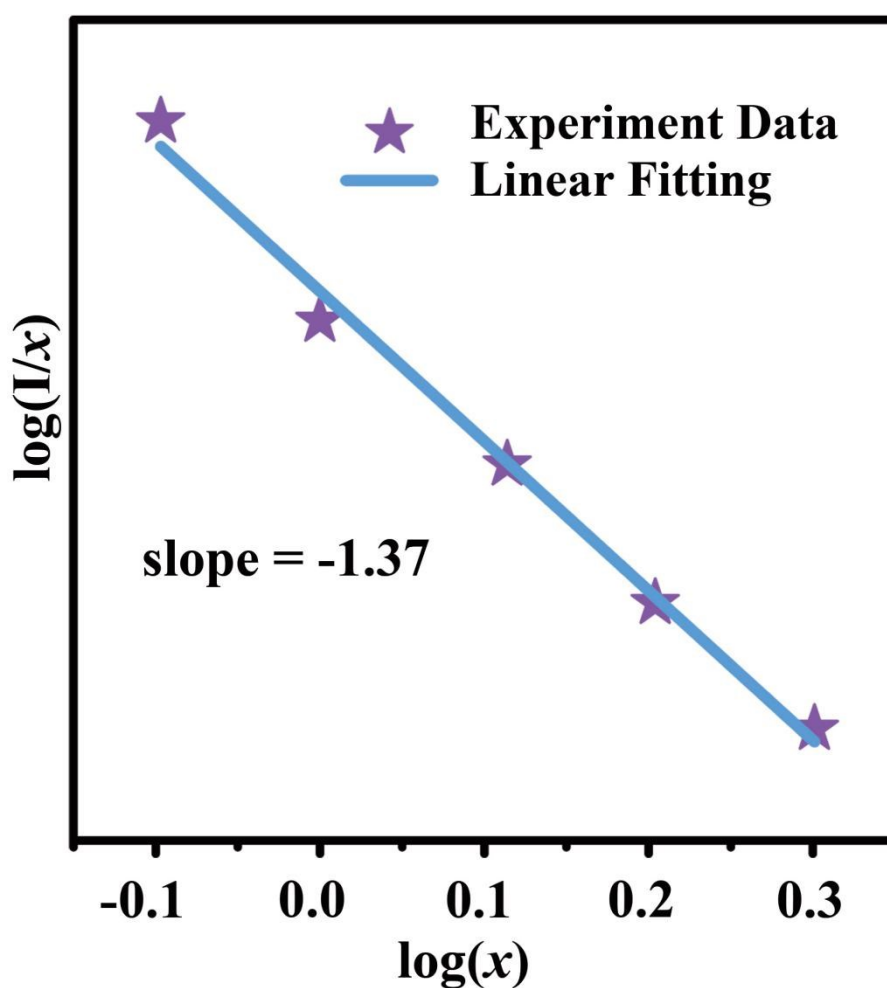

Figure S1. The dependence of  $\log(I/x)$  on  $\log(x)$  of the LMZ:  $x\text{Cr}^{3+}$  phosphors.

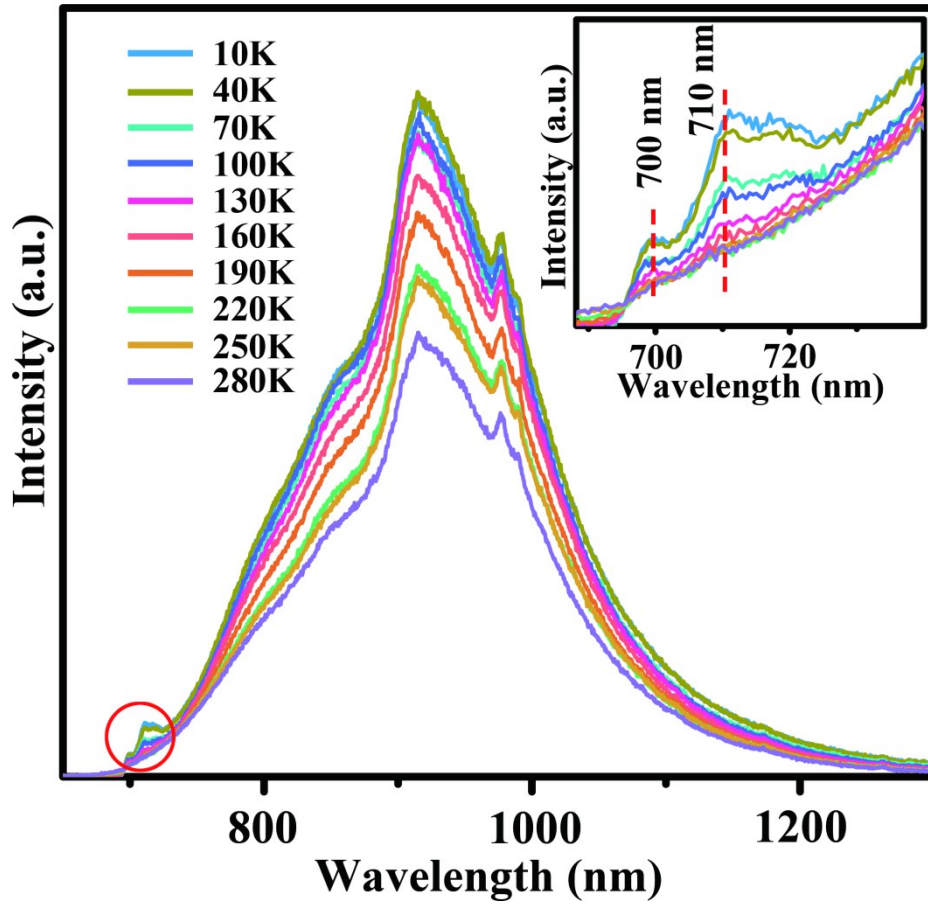

Figure S2. Temperature-dependent PL spectra of LMZ: 0.8%Cr<sup>3+</sup> upon 470 nm excitation.

Table S1. Structure Parameters of Li<sub>2</sub>MgZrO<sub>4</sub> from Crystallographic Information File (CIF).

|   |           |            | <i>x</i> | <i>y</i> | <i>z</i> | <i>Occ.</i> | <i>U</i> | <i>Site</i> | <i>Sym.</i> |
|---|-----------|------------|----------|----------|----------|-------------|----------|-------------|-------------|
| 1 | <i>O</i>  | <i>O1</i>  | 0.00000  | 0.25000  | 0.10800  | 1.000       | 0.015    | 8e          | 2mm         |
| 2 | <i>Zr</i> | <i>Zr1</i> | 0.00000  | 0.75000  | 0.12500  | 0.500       | 0.023    | 4a          | -4m2        |
| 3 | <i>Mg</i> | <i>Mg1</i> | 0.00000  | 0.75000  | 0.12500  | 0.500       | 0.023    | 4a          | -4m2        |
| 4 | <i>Li</i> | <i>Li1</i> | 0.00000  | 0.25000  | 0.37500  | 1.000       | 0.000    | 4b          | -4m2        |
